# Supplementary material for: Relative risk of diabetes, dyslipidaemia, hypertension and the metabolic syndrome in people with severe mental illnesses: Systematic review and metaanalysis
Source: PubMed Central journal article supplement (PMC2570660; doi:10.1186/1471-244x-8-84), 2008-09-25
Supplement: 1471-244X-8-84-S1.pdf [file 1471-244X-8-84-S1.pdf]

Search terms for Osborn et al: Relative risk of diabetes, dyslipidaemia, hypertension and the metabolic syndrome in people with severe mental illnesses.  
Systematic review and metaanalysis

## Appendices

Three groups/concepts were developed to execute the search to maximum effectiveness in terms of sensitivity and specificity and these are detailed below

### SMI terms

((BIPOLAR DISORDER\* in TI,AB,MA) or (psychotic symptom\* in TI,AB,MA) or (PSYCHOTIC ILLNESS\* in TI,AB,MA) or (explode "Schizophrenia-" / all SUBHEADINGS in MIME,MJME) or ("Schizophrenia-Paranoid" / all SUBHEADINGS in MIME,MJME) or (SCHIZOPHRENI\* in TI,AB,MA) or ("Psychotic-Disorders" / all SUBHEADINGS in MIME,MJME) or (SEVERE ENDURING MENTAL\* in TI,AB,MA) or (severe mental illness\* in TI,AB,MA) or (PSYCHOTIC DISORDER\* in TI,AB,MA) or (SCHIZO AFFECTIVE\* in TI,AB,MA) or (SCHIZOAFFECTIVE) or (SCHIZOAFFECTIV\* DISORDER\* in TI,AB,MA) or (MANIC\* DEPRESS\* in TI,AB,MA) or ("Bipolar-Disorder" / all SUBHEADINGS in MIME,MJME))

(mental disorder\* in TI,AB,MA)\* or ("Mental-Disorders" / all SUBHEADINGS in MIME,MJME)\*

### Cardiovascular terms

(myocardial ischaemi\* in TI,AB,MA) or ((CORONARY HEART DISEASE) or (TACHYCARDI\* in TI,AB,MA) or (explode "Tachycardia-" / all SUBHEADINGS in MIME,MJME) or (LONG QT SYNDROME in TI,AB,MA) or ("Long-QT-Syndrome" / all SUBHEADINGS in MIME,MJME) or (ARRHYTHMI\* in TI,AB,MA) or (explode "Arrhythmia-" / all SUBHEADINGS in MIME,MJME) or (HEART DISEASE\* in TI,AB,MA) or ("Heart-Diseases" / all SUBHEADINGS in MIME,MJME) or (cardiovascular disease\* in TI,AB,MA) or ("Cardiovascular-Diseases" / all SUBHEADINGS in MIME,MJME) or (HEART ATTACK\* in TI,AB,MA) or ("Heart-Arrest" / all SUBHEADINGS in MIME,MJME) or (HEART ARREST\* in TI,AB,MA) or ("Myocardial-Infarction" / all SUBHEADINGS in MIME,MJME) or (MYOCARDIAL INFARCTION\* in TI,AB,MA) or ("Coronary-Disease" / all SUBHEADINGS in MIME,MJME) or (coronary disease\* in TI,AB,MA) or (myocardial ischemia in TI,AB,MA) or (MYOCARDIAL DISEASE\* in TI,AB,MA) or ("Myocardial-Diseases" / all SUBHEADINGS in MIME,MJME))

### Terms related to cardiovascular risk factors, and physical comorbidity

#### **Hypertension**

(high blood pressure in TI,AB,MA) or (hypertensi\* in TI,AB,MA) or (explode "Hypertension-" / all SUBHEADINGS in MIME,MJME)

#### **Hyperlipidemia**

(hyperlipid\* in TI,AB,MA) or ((explode "Hyperlipoproteinemia+" / all SUBHEADINGS in MIME,MJME) or (explode "Hypercholesterolemia+" / all SUBHEADINGS in MIME,MJME) or (explode "Hypertriglyceridemia-" / all SUBHEADINGS in MIME,MJME) or (explode "Hyperlipidemia-" / all SUBHEADINGS in MIME,MJME)) or (lipid\* in AB,TI,MA) or (cholesterol in TI,MA,AB) or (explode "Cholesterol-" / all SUBHEADINGS in MIME,MJME)

#### **Diabetes**

(treatment emergent diabet\* in TI,AB,MA) or (impaired glucose metabolism in TI,AB,MA) or (impaired glucose tolerance in TI,AB,MA) or (diabet\* in TI,AB,MA) or ("Diabetes-Mellitus-Type-II" / all SUBHEADINGS in MIME,MJME) or ("Diabetes-Mellitus" / all SUBHEADINGS in MIME,MJME))

### **Left Ventricular Hypertrophy**

(left ventricular hypertrophy in TI,AB,MA) or (explode "Hypertrophy-Left-Ventricular" / all SUBHEADINGS in MIME,MJME)

### **Smoking**

("Smoking-Cessation" / all SUBHEADINGS in MIME,MJME) or (smoking in TI,AB,MA) or (explode "Smoking-" / all SUBHEADINGS in MIME,MJME) or (tobacco smoking in TI,AB,MA) or ("Tobacco-Use-Disorder" / all SUBHEADINGS in MIME,MJME) or (cigarette\* in TI,AB,MA) or (explode "Tobacco-Use-Cessation" / all SUBHEADINGS in MIME,MJME)

### **Diet**

(nutrition in TI,AB,MA) or (explode "Nutrition-" / all SUBHEADINGS in MIME,MJME) or (explode "Food-Habits" / all SUBHEADINGS in MIME,MJME) or (explode "Obesity-" / all SUBHEADINGS in MIME,MJME) or (diet in TI,AB,MA) or ((explode "Diet-Atherogenic" / WITHOUT SUBHEADINGS in MIME,MJME) or (explode "Diet-" / all SUBHEADINGS in MIME,MJME))

### **Exercise**

(explode "Exercise-" / all SUBHEADINGS in MIME,MJME) or (physical activity in TI,AB,MA) or (exercise in TI,AB,MA)

### **Self-Care**

(explode "Self-Care" / all SUBHEADINGS in MIME,MJME) or (self care in TI,AB,MA)

Terms excluded due to excessive yield of irrelevant papers.

### **“Risk”**

(risk factor\* in TI,AB,MA) or (explode "Risk-" / all SUBHEADINGS in MIME,MJME)

### **Antipsychotics**

(neuroleptic\* in TI,AB,MA) or (psychotropic\* in TI,AB,MA) or (explode "Psychotropic-Drugs" / all SUBHEADINGS in MIME,MJME) or (atypical antipsychotic\* in TI,AB,MA) or (explode "Antipsychotic-Agents" / all SUBHEADINGS in MIME,MJME)

### **Alcohol**

(alcohol\* in TI,AB,MA) or ((explode "Drinking-" / all SUBHEADINGS in MIME,MJME) or (explode "Alcoholism-" / all SUBHEADINGS in MIME,MJME) or (explode "Alcohol-Drinking" / all SUBHEADINGS in MIME,MJME) or (explode "Drinking-Behavior" / all SUBHEADINGS in MIME,MJME))

### **Attitude to health/health promotion**

((explode "Health-Promotion" / all SUBHEADINGS in MIME,MJME) or (explode "Life-Style" / all SUBHEADINGS in MIME,MJME) or (explode "Health-Behavior" / all SUBHEADINGS in MIME,MJME)) or (health behavio\* in TI,AB,MA) or (attitude to health in TI,AB,MA) or (attitude to health) or ("Health-Knowledge-Attitudes-Practice" / WITHOUT SUBHEADINGS in MIME,MJME) or ("Attitude-to-Health" / all SUBHEADINGS in MIME,MJME) or ("Patient-Acceptance-of-Health-Care+" / all SUBHEADINGS in MIME,MJME))
