# Supplementary material for: Relative risk of diabetes, dyslipidaemia, hypertension and the metabolic syndrome in people with severe mental illnesses: Systematic review and metaanalysis
Source: PubMed Central journal article supplement (PMC2570660; doi:10.1186/1471-244x-8-84), 2008-09-25
Supplement: 1471-244X-8-84-S2.pdf [file 1471-244X-8-84-S2.pdf]

TABLE 1: DIABETES AND HYPERGLYCAEMIA PAPERS

| Source                                  | Patient sample description                                                                                                                         | Comparison group description                                                                                                                      | Outcome measure                                                                                              | Prevalence estimates or Mean/SD                                                                                                                                                                                                                               | Main results                                                                                                                                                                                                                                                |
|-----------------------------------------|----------------------------------------------------------------------------------------------------------------------------------------------------|---------------------------------------------------------------------------------------------------------------------------------------------------|--------------------------------------------------------------------------------------------------------------|---------------------------------------------------------------------------------------------------------------------------------------------------------------------------------------------------------------------------------------------------------------|-------------------------------------------------------------------------------------------------------------------------------------------------------------------------------------------------------------------------------------------------------------|
| <b>(A) STUDIES WITH A CONTROL GROUP</b> |                                                                                                                                                    |                                                                                                                                                   |                                                                                                              |                                                                                                                                                                                                                                                               |                                                                                                                                                                                                                                                             |
| <i>Community Samples</i>                |                                                                                                                                                    |                                                                                                                                                   |                                                                                                              |                                                                                                                                                                                                                                                               |                                                                                                                                                                                                                                                             |
| Sokal et al, 2004 (USA) [12]            | N = 100. Men and women with SCZ or S-AFF                                                                                                           | N = 3052. Matched for age/race/gender (15:1 ratio). From NHIS national survey dataset                                                             | Diabetes (ascertained from patient interview) – lifetime prevalence                                          | <i>SMI</i> : Obs = 10/97 (10.3%)<br><i>Control</i> : Obs = 167/2861 (5.8%)                                                                                                                                                                                    | Unadjusted OR = 1.98 (0.99 to 3.96);<br>Adjusted OR <sup>c</sup> = 1.98 (0.95 to 4.10)<br>*Calculated RR = 1.77 (0.96 to 3.23)                                                                                                                              |
| Osborn et al, 2006 (UK: England) [8]    | N = 74. Men and women with SCZ, S-AFF or N-ACP                                                                                                     | N = 148. Men and women                                                                                                                            | Diabetes (recorded in GP records)                                                                            | <i>SMI</i> : Obs = 7/74 (9.6%)<br><i>Control</i> : Obs = 4/148 (2.7%)                                                                                                                                                                                         | Unadjusted OR = 3.8 (1.1 to 13.3);<br>Adjusted OR <sup>a</sup> = 3.7 (0.9 to 15.4);<br>Adjusted OR <sup>b</sup> = 6.0 (1.2 to 3.10)<br>*Calculated RR = 3.50 (1.06 to 11.58)                                                                                |
|                                         |                                                                                                                                                    |                                                                                                                                                   | Hyperglycaemia (random blood glucose > 11.0 mmol/L)                                                          | <i>SMI</i> : Obs = 5/74 (6.9%)<br><i>Control</i> : Obs = 6/148 (4.1%)                                                                                                                                                                                         | Unadjusted OR = 1.7 (0.5 to 5.9);<br>Adjusted OR <sup>a</sup> = 1.2 (0.3 to 4.9);<br>Adjusted OR <sup>b</sup> = 1.1 (0.2 to 5.4)                                                                                                                            |
|                                         |                                                                                                                                                    |                                                                                                                                                   | Mean random glucose levels (mmol/L)                                                                          | <i>SMI</i> : Mean = 6.1 mmol/L (SD 3.5)<br><i>Control</i> : Mean = 5.3 mmol/L (SD 2.1)                                                                                                                                                                        | SMI > Controls: t-test: F = -2.1, p = .003<br>*SMD = 0.302 (0.02-0.583)                                                                                                                                                                                     |
| McEvoy et al, 2005 (USA) [47]           | N=689. Men and women with chronic SCZ                                                                                                              | Compared to randomly selected population from the NHANES III study matched for age/race/gender (N=689)                                            | 1). Mean fasting glucose (mg/dl) (no SD)<br>2). Met the glucose criterion for metabolic syndrome (>110mg/dl) | <i>Males</i> : <i>SMI</i> mean = 97.7, <i>Control</i> mean = 102.4<br><i>Females</i> : <i>SMI</i> mean = 100.9 <i>Control</i> mean = 99.9<br><i>Males</i> : <i>SMI</i> 14.1%, <i>Controls</i> 14.2%<br><i>Females</i> <i>SMI</i> 21.7%, <i>Controls</i> 11.2% | SMI < controls: t test p=0.034<br>SMI = controls: t test p=0.793<br>SMI = controls: chi sq p=0.964<br>SMI > controls: chi sq p=0.008                                                                                                                        |
| <i>Outpatient and Inpatient Samples</i> |                                                                                                                                                    |                                                                                                                                                   |                                                                                                              |                                                                                                                                                                                                                                                               |                                                                                                                                                                                                                                                             |
| Curkendall et al, 2004 (USA) [14]       | N = 3022. Men and women with SCZ. Members of US health plans                                                                                       | N = 12088. Matched for age/gender (4:1 ratio). Randomly selected from same health databases                                                       | Diabetes diagnosis (ICD-9 Code 250) or prescriptions for oral anti-diabetic medications or insulin           | <i>SMI</i> : Prevalence = 91.7 per 1000<br>Incidence = 7.0 per 1000 person-years<br><i>Control</i> : Prevalence = 50.5 per 1000<br>Incidence = 4.3 per 1000 person-years                                                                                      | <i>Prevalence</i> : Unadjusted OR = 1.9 (1.6 to 2.2);<br>Adjusted OR <sup>d</sup> = 2.1 (1.8 to 2.4)<br><i>Incidence</i> : Unadjusted RR = 1.6 (1.2 to 2.2);<br>Adjusted RR <sup>d</sup> = 1.8 (1.2 to 2.6)<br>*Calculated risk ratio = 1.82 (1.58 to 2.08) |
| Enger et al, 2004 (USA) [8]             | N = 1920. Men and women with SCZ. Members of US health plan                                                                                        | N = 9600. Matched for age/gender (5:1 ratio). Identified from same health plan database                                                           | Diabetes diagnosis (ICD-9 Code 250) or at least one dispensing of anti-diabetic drug                         | <i>SMI</i> : Obs = 105 events<br>Rate = 3464 per 100,000 person-years<br><i>Control</i> : Obs = 201 events<br>Rate = 1380 per 100,000 person-years                                                                                                            | Adjusted rate ratio <sup>e</sup> = 1.75 (1.38 to 2.21)<br>*Calculated risk ratio = 2.00 (1.62 to 2.46)                                                                                                                                                      |
| Kilbourne et al, 2004 (USA) [16]        | N = 4310. Men and women with BPAD from National US Veterans cohort                                                                                 | N = 3408760. Men and women. From same Veterans cohort                                                                                             | Diabetes diagnosis (ICD-9)                                                                                   | <i>SMI</i> : Obs = 743 /4310 (17.2%)<br><i>Control</i> : Obs = 532926/3408760 (15.6%)                                                                                                                                                                         | None reported<br>*Calculated risk ratio = 1.10 (1.03 to 1.18)                                                                                                                                                                                               |
| <i>Inpatient Samples</i>                |                                                                                                                                                    |                                                                                                                                                   |                                                                                                              |                                                                                                                                                                                                                                                               |                                                                                                                                                                                                                                                             |
| Finney, 1989 (Sweden) [17]              | Search of inpatient register (1969-1983) to identify conscripts (N = 621074) with diabetes diagnosis <u>and</u> SCZ. All males aged under 27 years | Members of same conscript cohort (National Enrolment Register 1969-1979) with diabetes diagnosis but <u>no</u> SCZ. All males aged under 27 years | <i>Juvenile</i> onset diabetes (ICD Code 250)                                                                | <i>Diabetics with schizophrenia</i> : Obs = 0; Exp = 4<br><i>Diabetics without schizophrenia</i> : Obs = 1154 cases (Rate = 1.9 per 1000)<br><i>General population rates (1969-1983)</i> : For age 0-19 = 0.2 per 1000                                        | None reported                                                                                                                                                                                                                                               |
| Makikyro et al, 1998 (Finland) [18]     | N = 89. Members of 1966 Birth Cohort with SCZ. Followed up 1982-1994. No gender information                                                        | N = 10630. Members of same Birth Cohort with no history of psychiatric disorder. Men and women                                                    | Diabetes mellitus (hospital-treated cases): ICD-8 and ICD-9                                                  | <i>SMI</i> : Obs = 0/89 (0%)<br><i>Control</i> : Obs = 78/10630 (0.7%).                                                                                                                                                                                       | None reported<br>*Calculated risk ratio = 0.75 (0.05 to 12.04)                                                                                                                                                                                              |
| Ryan et al, 2003 (Finland) [19]         | N = 26. Men and women with SCZ. First-episode and drug-naive                                                                                       | N = 26. Men and women                                                                                                                             | Impaired glucose tolerance (>110 mg/dl and <125 mg/dl)<br>Mean fasting blood glucose (mg/dL)                 | <i>SMI</i> : 4/26 (15.4%)<br><i>Control</i> : 0/26 (0%)<br><i>SMI</i> : Mean = 95.8 (SD 16.9)<br><i>Control</i> : Mean = 88.2 (SD 5.4)                                                                                                                        | None reported<br>*Calculated risk ratio = 9.00 (0.51 to 159.15)<br>SMI > Controls (t-test, p <.03)<br>*SMD = 0.606 (0.049 to 1.162)                                                                                                                         |
| Saari et al, 2005 (Finland) [20]        | N = 31. Men and women with SCZ. Members of 1966 Birth Cohort followed up in 1997/1998                                                              | N = 5455. Men and women with no history of psychiatric treatment. From same 1966 Birth Cohort                                                     | Fasting blood glucose ≥ 110 mg/dL                                                                            | <i>SMI</i> : Obs = 0/31 (0%)<br><i>Control</i> : Obs = 157/5455 (3%)                                                                                                                                                                                          | None reported<br>*Calculated risk ratio = 0.54 (0.03 to 8.50)                                                                                                                                                                                               |
| Arranz et al, 2004 (Spain) [21]         | Men and women with SCZ. <i>Antipsychotic-free</i> group: N=50<br><i>Antipsychotic-naive</i> group: N = 50 (first psychotic episode)                | N = 50. Men and women. Hospital staff with no history of SCZ or medication affecting glucose homeostasis                                          | Mean fasting blood glucose (mmol/L)                                                                          | <i>Antipsychotic-free</i> : Mean = 4.47 (SD 0.08)<br><i>Antipsychotic-naive</i> : Mean = 4.33 (SD 0.05)<br><i>Control</i> group: Mean = 4.22 (SD 0.08)                                                                                                        | No significant differences– ANCOVA <sup>f</sup> , p = .21<br>*SMDs<br><i>Antipsychotic-free</i> = 3.125 (2.538 to 3.712)<br><i>Antipsychotic-naive</i> = 1.649 (1.194 to 2.104)                                                                             |

TABLE 1: DIABETES AND HYPERGLYCAEMIA PAPERS (continued)

| (B) STUDIES COMPARING PATIENTS WITH SMI TO NORMATIVE DATA |                                                                                                                                                                                                                                         |                                                                                                                                                                                                                  |                                                                                                                                  |                                                                                                                                                                                                                                                                                                                                                                                    |                                                                                                                  |
|-----------------------------------------------------------|-----------------------------------------------------------------------------------------------------------------------------------------------------------------------------------------------------------------------------------------|------------------------------------------------------------------------------------------------------------------------------------------------------------------------------------------------------------------|----------------------------------------------------------------------------------------------------------------------------------|------------------------------------------------------------------------------------------------------------------------------------------------------------------------------------------------------------------------------------------------------------------------------------------------------------------------------------------------------------------------------------|------------------------------------------------------------------------------------------------------------------|
| Source                                                    | Patient sample description                                                                                                                                                                                                              | Comparison group description                                                                                                                                                                                     | Outcome measure                                                                                                                  | Prevalence estimates or Mean/SD                                                                                                                                                                                                                                                                                                                                                    | Main results                                                                                                     |
| <i>Outpatient Samples</i>                                 |                                                                                                                                                                                                                                         |                                                                                                                                                                                                                  |                                                                                                                                  |                                                                                                                                                                                                                                                                                                                                                                                    |                                                                                                                  |
| Lamberti et al, 2004 (USA) [22]                           | N = 196. Patients with SCZ. No gender information                                                                                                                                                                                       | Compared to general population rate for comparable age groups (data from Mokdad et al, 2001)                                                                                                                     | Diagnosis of diabetes (medical chart review)                                                                                     | <i>SMI</i> : Obs = 27/196 (13.8%)<br><i>General population rate</i> : 7.3%                                                                                                                                                                                                                                                                                                         | None reported.<br>*Calculated risk ratio = 1.89                                                                  |
| Dickerson et al, 2002 (USA) [23]                          | N = 43. All <i>females</i> , with SCZ or S-AFF                                                                                                                                                                                          | N = 101. Age-range matched females from Maryland Behavioural Risk Factor Survey (BFRS) 1999 dataset                                                                                                              | Diabetes (ever) – self-reported in interview using BRFS tool                                                                     | <i>SMI</i> : Obs = 6/43 (14%) (CI: 5 to 28%)<br><i>Controls</i> : Obs = 8/101 (8%) (CI: 6 to 10%)                                                                                                                                                                                                                                                                                  | None reported<br>*Calculated risk ratio = 1.90 (0.70 to 5.16)                                                    |
| <i>Outpatient and Inpatient Samples</i>                   |                                                                                                                                                                                                                                         |                                                                                                                                                                                                                  |                                                                                                                                  |                                                                                                                                                                                                                                                                                                                                                                                    |                                                                                                                  |
| Casadebaig et al, 1997 (France) [24]                      | N = 3470. Men and women with SCZ                                                                                                                                                                                                        | Compared to INSEE-CREDES 1991 general population survey data.                                                                                                                                                    | Treatment for diabetes (ICD-9 Code 250)                                                                                          | <i>SMI</i> : Males Obs = 24; Females: Obs = 30<br><i>Controls</i> : No prevalence estimates reported                                                                                                                                                                                                                                                                               | <i>Standardised Morbidity Ratio</i><br>Male SMR = 4.0 (Chi square p<.05)<br>Female SMR = 2.0 (Chi square p<.05). |
| Dixon et al, 2000 (USA) [25]                              | (i) <i>Field Study</i> (1994-96): N = 719. Men and women with SCZ. (ii) <i>Medicaid Data</i> (1991): N = 6066. Men and women with SCZ, S-AFF or SFD. (iii) <i>Medicare Data</i> (1991): N = 14182. Men and women with SCZ, S-AFF or SFD | Compared to general population self-reported rates from National Health Interview Survey (NHIS 1994) – Adams & Marano, 1995                                                                                      | <i>Field Study</i> : Self-reported diabetes: lifetime and current.<br><i>Medicaid/Medicare Data</i> : Any diabetes-related claim | <i>SMI</i> :<br>(i) <i>Field Study</i> : Lifetime diabetes: 107/719 (14.9%); Current diabetes: 78 cases (10.8%);<br>(ii) <i>Medicaid claims</i> : 673/6066 (11.1%). Age 18-44 = 6.7%; Age 45-64 = 18.8%<br>(iii) <i>Medicare claims</i> : 1766/14182 (12.5%). Age 18-44 = 5.6%; Age 45-64 = 14.9%<br><i>Cited general population rates</i> :<br>Age 18-44 = 1.2%; Age 45-64 = 6.3% | None reported<br>*Calculated risk ratio = 4.67 (age 18-44 yrs)<br>*Calculated risk ratio = 2.36 (age 45-64 yrs)  |
| Susce et al, 2005 (USA) [46]                              | N=560. Men and women with SCZ, S-AFF, BPAD, DEP                                                                                                                                                                                         | Compared to Kentucky general population (percentages not raw data)                                                                                                                                               | Diagnosis of diabetes (medical chart review)                                                                                     | <i>SMI</i> : Obs = 101/560 (18%)<br><i>Controls</i> = 7%                                                                                                                                                                                                                                                                                                                           | Reported OR: 2.9 (95%CI=2.3to 3.6)<br>*Calculated risk ratio=2.57                                                |
| <i>Inpatient Samples</i>                                  |                                                                                                                                                                                                                                         |                                                                                                                                                                                                                  |                                                                                                                                  |                                                                                                                                                                                                                                                                                                                                                                                    |                                                                                                                  |
| Lilliker, 1980 (USA) [26]                                 | N = 1134. Patients with SCZ discharged 1973-1978. No gender information                                                                                                                                                                 | Compared to general population data from National Health Survey 1960/62                                                                                                                                          | Diabetic diet recorded in dietary records                                                                                        | <i>SMI</i> : Obs = 38/1134 (3.3%)<br><i>General population rate</i> = 1.8%                                                                                                                                                                                                                                                                                                         | None reported                                                                                                    |
| Regenold et al, 2002 (USA) [27]                           | N = 71. Men and women with SCZ. Older Adults (age 50-74 yrs)                                                                                                                                                                            | Compared to general population survey data for age, race and gender matched rates (NHANES III study)                                                                                                             | Diagnosis of Diabetes Type 2 or prescription for insulin or oral hypoglycaemics (chart review)                                   | <i>SMI</i> : Obs = 9/71 (13%)<br><i>General population rate</i> = 15% (matched controls)                                                                                                                                                                                                                                                                                           | None reported<br>*Calculated risk ratio = 0.84                                                                   |
| Hung et al, 2005 (Taiwan) [28]                            | N = 246. Men and women with SCZ                                                                                                                                                                                                         | Compared to general population rates based on data from Lu et al (1998).                                                                                                                                         | Diagnosis of diabetes (on fasting plasma glucose > 126 mg/dL)                                                                    | <i>SMI</i> : Obs = 24/246 (9.8%)<br><i>General population</i> : Obs = 120/1534 (7.8%)                                                                                                                                                                                                                                                                                              | None reported<br>*Calculated risk ratio = 1.25 (0.822 to 1.893)                                                  |
| Regenold et al, 2002 (USA) [27]                           | N = 20. Men and women with S-AFF. Older Adults (age 50-74 yrs)                                                                                                                                                                          | Compared to general population survey data (age, race and gender matched rates – NHANES III study)                                                                                                               | Diagnosis of Type 2 Diabetes or prescription of insulin or oral hypoglycaemics (chart review)                                    | <i>SMI</i> : Obs = 10/20 (50%)<br><i>General population rate</i> = 10% (matched controls)                                                                                                                                                                                                                                                                                          | None reported<br>*Calculated risk ratio = 5.0                                                                    |
| Cohen et al, 2003 (Netherlands) [29]                      | N = 93. Men and women with SCZ or S-AFF                                                                                                                                                                                                 | Compared to Dutch general population rates (Nivel, 1999 study)                                                                                                                                                   | Diabetes Mellitus Type 2 (non-fasting blood glucose > 11.0 mmol/L)                                                               | <i>SMI</i> : Observed rate = 7.5%<br><i>General population rate</i> = 1.9%                                                                                                                                                                                                                                                                                                         | OR = 4.288 (CI 1.979 to 9.289)<br>*Calculated risk ratio = 3.95                                                  |
| Lilliker, 1980 (USA) [26]                                 | <i>Study 1</i> : N = 203. Men and women with BPAD. <i>Study 2</i> : N = 129. Patients with BPAD discharged 1973-1978. No gender information.                                                                                            | <i>Study 1</i> : Compared to general population rates from National Health Survey 1960/62 (N=6692). <i>Study 2</i> : Compared to inpatients discharged 1973-1978 with 'other' diagnoses ( <i>including</i> SCZ). | <i>Study 1</i> : Diagnosis of diabetes recorded in notes<br><i>Study 2</i> : Diabetic diet noted in dietary records              | <i>Study 1</i> : Diagnosed cases (note review):<br><i>Bipolar</i> : Obs = 20/203 (9.85%)<br>Males = 4/79 (5.06%); Females = 16/124 (12.9%)<br><i>General population rate (expected)</i> = 1.8%<br><i>Study 2</i> : Based on dietary records:<br><i>Bipolar</i> : Obs = 16/129 (12.4%)<br><i>Other diagnoses</i> : Obs = 121/4379 (2.8%)                                            | None reported<br>*Calculated risk ratio = 5.47                                                                   |
| Cassidy et al, 1999 (USA) [30]                            | N = 345. Men and women with BPAD                                                                                                                                                                                                        | Compared with general population norms                                                                                                                                                                           | Diagnosis of diabetes (from medical history review) – Type I or Type II                                                          | <i>SMI (matched sample)</i> : Obs = 34/345 (9.9%)<br><i>SMI (unmatched sample)</i> : Obs = 36/357 (10.1%)<br><i>Expected rate (from US norms)</i> = 3.5%                                                                                                                                                                                                                           | None reported<br>*Calculated risk ratio = 2.83                                                                   |

TABLE 1: DIABETES AND HYPERGLYCAEMIA PAPERS (Continued)

| Source                                                                          | Patient sample description                                                                        | Comparison group description                                                                                                                                | Outcome measure                                                                                        | Prevalence estimates or Mean/SD                                                                                                      | Main results                                                                                                                                                            |
|---------------------------------------------------------------------------------|---------------------------------------------------------------------------------------------------|-------------------------------------------------------------------------------------------------------------------------------------------------------------|--------------------------------------------------------------------------------------------------------|--------------------------------------------------------------------------------------------------------------------------------------|-------------------------------------------------------------------------------------------------------------------------------------------------------------------------|
| <b>Inpatient samples (continued)</b>                                            |                                                                                                   |                                                                                                                                                             |                                                                                                        |                                                                                                                                      |                                                                                                                                                                         |
| Regenold et al, 2002 (USA) [27]                                                 | N = 53. Men and women with BPAD. Older Adults (age 50-74 yrs)                                     | Compared to general population survey data (age, race and gender matched rates – NHANES III study)                                                          | Diagnosis of Type 2 Diabetes or prescription of insulin or oral hypoglycaemics (chart review)          | SMI: Obs = 14/53 (26%)<br>General population rate = 13% (matched cases)                                                              | None reported<br>*Calculated risk ratio = 2.03                                                                                                                          |
| Regenold et al, 2002 (USA) [27]                                                 | N = 144. Men and women with SCZ, S-AFF or BPAD. Older Adults (age 50-74 years)                    | Compared to general population survey data (NHANES III study)                                                                                               | Diagnosis of Type 2 Diabetes or prescription for insulin or oral hypoglycaemics (chart review)         | SMI: Obs = 33/144 (22.9%)<br>General population rate = 14%                                                                           | None reported                                                                                                                                                           |
| Cohen et al, 2003 (Netherlands) [29]                                            | N = 93. Men and women with SCZ or S-AFF                                                           | Compared to general population rates – by age group (Hoorn, 1995 study)                                                                                     | Hyperglycaemia (non-fasting blood glucose >7.8 and < 11.0 mmol/L)                                      | SMI: Obs = 11/93 (11.83%)<br>Age 20-49 = 15.2%; Age 50-59 = 13.0%<br>General population rates:<br>Age 20-49 = 5.7%; Age 50-59 = 6.3% | Age 20-49 years:<br>OR = 2.959 (CI 1.230 to 7.119)<br>Age 50-59 years<br>OR = 2.220 (CI 0.0644 to 7.650)                                                                |
| <b>Long Stay Samples</b>                                                        |                                                                                                   |                                                                                                                                                             |                                                                                                        |                                                                                                                                      |                                                                                                                                                                         |
| Mukherjee et al, 1996 (Italy) [31]                                              | N = 95. Men and women with SCZ                                                                    | Compared to general population data from 2 studies – Verriollo et al (1985) and Bruno et al (1992)                                                          | Diagnosis of diabetes – record of OGTT fasting plasma glucose > 140 mg/dL on ≥ 2 occasions             | SMI: Obs = 15/95 (15.8%) (CI 12.1% to 19.5%)<br>General population rates:<br>1985 data = 3.2%; 1992 data = 2.1%                      | None reported<br>*Calculated risk ratio = 4.93                                                                                                                          |
| Subramaniam et al, 2003 (Singapore) [32]                                        | N = 194. Men and women with SCZ                                                                   | Compared to prevalence rates for general population (National Health Survey Singapore 1998)                                                                 | Prevalence of diabetes (via OGTT using WHO criteria)                                                   | SMI: Obs = 31/194 (16%)<br>General population rate = 9%                                                                              | None reported<br>*Calculated risk ratio = 1.77                                                                                                                          |
|                                                                                 |                                                                                                   |                                                                                                                                                             | Impaired glucose tolerance (via OGTT using WHO criteria)                                               | SMI: Obs = 60/194 (30.9%)<br>General population rate = 15%                                                                           | None reported                                                                                                                                                           |
| <b>(C) STUDIES COMPARING PATIENTS WITH SMI TO PATIENTS WITH OTHER DIAGNOSES</b> |                                                                                                   |                                                                                                                                                             |                                                                                                        |                                                                                                                                      |                                                                                                                                                                         |
| <b>Community Samples</b>                                                        |                                                                                                   |                                                                                                                                                             |                                                                                                        |                                                                                                                                      |                                                                                                                                                                         |
| Chafetz et al, 2005 (USA) [33]                                                  | N = 271. Men, women and transgender with SCZ or S-AFF                                             | N = 510. Men and women with 'other' diagnoses (including BPAD)                                                                                              | Diabetes (ascertained from nursing notes)                                                              | SCZ/S-AFF group: Obs = 20/271 (7.4%)<br>'Other diagnoses' group: Obs = 16/510 (3.1%)                                                 | None reported<br>*Calculated risk ratio = 2.35 (1.239 to 4.464)                                                                                                         |
| <b>Outpatient Samples</b>                                                       |                                                                                                   |                                                                                                                                                             |                                                                                                        |                                                                                                                                      |                                                                                                                                                                         |
| Gierz & Jeste, 1993 (USA) [34]                                                  | N = 30. Men and women with SCZ – predominantly male. Elderly veterans: mean age 67.6 yrs (SD 6.5) | N = 26. Men and women with DEP from same clinic. Elderly veterans: mean age 66.5 yrs (SD 4.5). Also cite population rates for age >65 years (Schick, 1986). | Diabetes mellitus (ascertained from chart review, computerised profiles, prescription records)         | SCZ group: Prevalence rate = 16.7%<br>DEP group: Prevalence rate = 15.4%<br>Cited population norms: Rate = 8.3%.                     | None reported<br>*Calculated risk ratio = 2.01                                                                                                                          |
| Lamberti et al, 2004 (USA) [22]                                                 | N = 196. Patients with SCZ. No gender information                                                 | N = 240. Patients with other psychiatric diagnoses (including S-AFF, BPAD, DEP and other psychotic disorders)                                               | Diagnosis of diabetes (medical chart review)                                                           | Schizophrenia group: Obs = 27/196 (13.8%)<br>'Other diagnoses' group: Obs = 35/240 (14.6%)                                           | None reported                                                                                                                                                           |
| <b>Inpatient Samples</b>                                                        |                                                                                                   |                                                                                                                                                             |                                                                                                        |                                                                                                                                      |                                                                                                                                                                         |
| Kessing et al, 2004 (Denmark) [35]                                              | N = 6706. Men and women with BPAD. Excluded patients with an existing diagnosis of diabetes       | (a) N = 108525 patients with osteoarthritis. Men and women<br>(b) N = 29035 patients with DEP. Men and women                                                | Diagnosis of diabetes during study period: ICD-8 (Codes 249.00-250.09) or ICD-10 (Codes DE10.0-DE11.9) | Bipolar: Obs = 101/6706 (1.51%)<br>Osteoarthritis: Obs = 1980/108525 (1.82%)<br>DEP: Obs = 358/29035 (1.23%)                         | None reported<br>*Calculated risk ratio = 1.22 (0.981 to 1.521) – compared to Depression<br>*Calculated risk ratio = 0.83 (0.677 to 1.007) – compared to Osteoarthritis |
| <b>Long Stay Samples</b>                                                        |                                                                                                   |                                                                                                                                                             |                                                                                                        |                                                                                                                                      |                                                                                                                                                                         |
| Steinert et al, 1996 (Germany) [36]                                             | N = 90. Men and women with SCZ or S-AFF                                                           | N = 90. Men and women with DEP.                                                                                                                             | Diabetes mellitus (unclear how ascertained from notes)                                                 | SMI: Males: Obs = 3/43 (7%)<br>Females: Obs = 8/47 (17%)<br>Non-SMI: Males: Obs = 2/43 (4.7%)<br>Females: Obs = 3/47 (6.4%)          | None reported<br>*Calculated risk ratio = 2.2 (0.796 to 6.076)                                                                                                          |

Notes: <sup>a</sup> Adjusted for age and gender; <sup>b</sup> Adjusted for age, gender and unemployment; <sup>c</sup> Adjusted for body mass index (BMI); <sup>d</sup> Adjusted for age, sex and relevant medical risk factors; <sup>e</sup> Adjusted for age, gender, year of initial dispensing, ratio of dispensed days to total days, diabetes, anti-angina medications, anti-hypertensive medication; <sup>f</sup> Controlling for age, BMI, sex and family history of diabetes; \* If odds ratios or risk ratios are not reported in papers, risk ratios have been calculated wherever possible.

Abbreviations: SCZ = Schizophrenia; S-AFF = Schizoaffective Disorder; BPAD = Bipolar Affective Disorder; N-ACP = Non-affective Chronic Psychotic Illness; SFD = Schizophreniform Disorder; DEP = Depression/Major Depressive Disorder; OGTT = Oral Glucose Tolerance Test. Obs=observations

TABLE 2: HYPERTENSION PAPERS

| Source                                                           | Patient sample description                                            | Comparison group description                                                                             | Outcome measure                                                                                                              | Prevalence estimates or Mean/SD                                                                                                                                                                                                                                                                                                                                            | Main results                                                                                                                                                                                                            |
|------------------------------------------------------------------|-----------------------------------------------------------------------|----------------------------------------------------------------------------------------------------------|------------------------------------------------------------------------------------------------------------------------------|----------------------------------------------------------------------------------------------------------------------------------------------------------------------------------------------------------------------------------------------------------------------------------------------------------------------------------------------------------------------------|-------------------------------------------------------------------------------------------------------------------------------------------------------------------------------------------------------------------------|
| <b>(A) STUDIES WITH A CONTROL GROUP</b>                          |                                                                       |                                                                                                          |                                                                                                                              |                                                                                                                                                                                                                                                                                                                                                                            |                                                                                                                                                                                                                         |
| <i>Community Samples</i>                                         |                                                                       |                                                                                                          |                                                                                                                              |                                                                                                                                                                                                                                                                                                                                                                            |                                                                                                                                                                                                                         |
| Sokal et al, 2004 (USA)[12]                                      | N = 97. Men and women with SCZ or S-AFF                               | N = 2861. Matched for age, race and gender (15:1 ratio). Randomly selected from national survey datasets | Lifetime prevalence of hypertension – self-reported in face to face interview                                                | <i>SMI</i> : Obs = 24/97 (24.7%)<br><i>Control</i> : Obs = 673/2861 (23.6%)                                                                                                                                                                                                                                                                                                | Unadjusted OR = 1.09 (0.67 to 1.77)<br>Adjusted OR <sup>a</sup> = 1.04 (0.62 to 1.74)<br>Adjusted OR <sup>b</sup> = 1.05 (0.64 to 1.71)<br>*Calculated risk ratio = 1.05 (0.74 to 1.50)                                 |
| Osborn et al, 2006 (UK: England)[13]c                            | N = 74. Men and women with SCZ, S-AFF or N-ACP                        | N = 148. Men and women                                                                                   | Prevalence of hypertension (Systolic BP > 160 or Diastolic BP > 95 mmHg)                                                     | <i>SMI</i> Obs = 9/74 (12.2%)<br><i>Control</i> : Obs = 19/148 (12.8%)                                                                                                                                                                                                                                                                                                     | Unadjusted OR = 0.9 (0.4 to 2.2)<br>Adjusted OR <sup>d</sup> = 0.7 (0.3 to 1.8)<br>Adjusted OR <sup>e</sup> = 0.5 (0.4 to 2.2)<br>*Calculated risk ratio = 0.95 (0.45 to 1.99)                                          |
| <i>Outpatient and Inpatient Samples</i>                          |                                                                       |                                                                                                          |                                                                                                                              |                                                                                                                                                                                                                                                                                                                                                                            |                                                                                                                                                                                                                         |
| Curkendall et al, 2004 (USA) [14]                                | N = 3022. Men and women with SCZ                                      | N = 12088. Men and women. Age and sex matched (4:1 ratio). Randomly selected from health databases       | Prevalence of hypertension (ICD-9 Code 401 to 405)                                                                           | <i>SMI</i> : Obs = 414/3022 (13.7%)<br><i>Control</i> : Obs = 2019/12088 (16.7%)                                                                                                                                                                                                                                                                                           | No OR reported<br>*Calculated risk ratio = 0.82 (0.74 to 0.90)                                                                                                                                                          |
| McEvoy et al, 2005 (USA) [47]                                    | N=687. Men and women with chronic SCZ                                 | Compared to population from NHANES III study matched for age/race/gender (n=687)                         | 1) Met metabolic syndrome blood pressure criteria<br>2). Mean systolic BP (mmHg) No SD<br>3). Mean diastolic BP (mmHg) No SD | <i>Male</i> : <i>SMI</i> : 47.2% of 508; <i>controls</i> : 31.1%<br><i>Female</i> : 46.9% of 179; <i>controls</i> : 26.8%<br><i>Male</i> : <i>SMI</i> : 124 mmHg; <i>Control</i> =123.4<br><i>Female</i> : <i>SMI</i> : 122mmHg; <i>Control</i> =119<br><i>Male</i> : <i>SMI</i> : 79 mmHg; <i>Control</i> =77<br><i>Female</i> : <i>SMI</i> : 80mmHg; <i>Control</i> : 73 | No OR Reported; *calculated risk ratio for males and females combined =1.57 (1.37-1.81)<br>SMI=controls T test: p=0.295<br>SMI=controls T test: p=0.063<br>SMI>controls T test: p=0.000<br>SMI>controls T test: p=0.000 |
| Kilbourne et al, 2004 (USA)[16]                                  | N = 4310. Men and women with BPAD or cyclothymia. US Veterans.        | N = 3408760. National Veterans cohort. Demographically similar to patient group                          | Prevalence of hypertension (ICD-9 – codes not specified)                                                                     | <i>SMI</i> : Obs = 1500/4310 (34.8%)<br><i>Control</i> : Obs = 1256034/3408760 (36.8%)                                                                                                                                                                                                                                                                                     | No OR reported<br>*Calculated risk ratio = 0.94 (0.91 to 0.98)                                                                                                                                                          |
| <i>Inpatient Samples</i>                                         |                                                                       |                                                                                                          |                                                                                                                              |                                                                                                                                                                                                                                                                                                                                                                            |                                                                                                                                                                                                                         |
| Saari et al, 2005 (Finland) [20]f                                | N = 31. Men and women with SCZ. All in early 30's (1966 Birth Cohort) | N = 5455. Men and women from same birth cohort.                                                          | Prevalence of hypertension (BP ≥ 130/85 mmHg)                                                                                | <i>SMI</i> : Obs = 15/31 (48%)<br><i>Control</i> : Obs = 2209/5455 (40%)                                                                                                                                                                                                                                                                                                   | No OR reported<br>*Calculated risk ratio = 1.19 (0.83 to 1.72)                                                                                                                                                          |
| <b>(B) STUDIES COMPARING PATIENTS WITH SMI TO NORMATIVE DATA</b> |                                                                       |                                                                                                          |                                                                                                                              |                                                                                                                                                                                                                                                                                                                                                                            |                                                                                                                                                                                                                         |
| <i>Outpatient Samples</i>                                        |                                                                       |                                                                                                          |                                                                                                                              |                                                                                                                                                                                                                                                                                                                                                                            |                                                                                                                                                                                                                         |
| Dickerson et al, 2002 (USA)[23]                                  | N = 43. Females with SCZ or S-AFF. Age 40-70 years.                   | N = 101. Age-matched females from Maryland Behavioural Risk Factor Survey (BFRS) 1999 dataset            | Prevalence of hypertension – self-reported in interview (using BFRS)                                                         | <i>SMI</i> : Obs = 16/43 (37%) (CI: 7%-53%)<br><i>General population rate</i> = 28% (CI: 24%-31%)                                                                                                                                                                                                                                                                          | No OR reported<br>*Calculated risk ratio = 1.33                                                                                                                                                                         |
| <i>Outpatient and Inpatient Samples</i>                          |                                                                       |                                                                                                          |                                                                                                                              |                                                                                                                                                                                                                                                                                                                                                                            |                                                                                                                                                                                                                         |
| Casadebaig et al, 1997 (France)[24]                              | N = 3470. Men and women with SCZ                                      | Men and women from INSEE-CREDES 1991 survey dataset (representative sample of French general population) | Prevalence of hypertensive disease (ICD-9 Codes 401-405)                                                                     | <i>SMI Males</i> : Obs = 51 cases<br><i>SMI Females</i> : Obs = 33 cases<br>Comparison group rates not reported                                                                                                                                                                                                                                                            | Standardised Morbidity Ratios (no CI reported): Male SMR = 2.0; Female SMR = 0.5                                                                                                                                        |
| Cohn et al, 2004 (Canada) [37]f                                  | N = 240. Men and women with SCZ or S-AFF                              | General population rates from Canadian Heart Health Survey (1986-1990)                                   | Prevalence of hypertension (BP ≥ 135/85 mm Hg or current treatment with antihypertensive medication)                         | Presented as graphs – exact values not given in table or text.                                                                                                                                                                                                                                                                                                             | No OR reported                                                                                                                                                                                                          |
| Susce et al, 2005 (USA) [46]                                     | N=560. Men and women with SCZ, S-AFF, BPAD, DEP                       | Compared to Kentucky general population prevalence; no raw data                                          | Prevalence of hypertension from medical charts                                                                               | <i>SMI</i> : obs 151/560= 27%<br><i>Control</i> = 30%                                                                                                                                                                                                                                                                                                                      | OR=0.86,95%CI=0.71 to 1.03)<br>*Calculated risk ratio=0.9                                                                                                                                                               |

TABLE 2: HYPERTENSION PAPERS (continued)

| Source                                                                          | Patient sample description                                                                  | Comparison group description                                                                                               | Outcome measure                                                                                                                                                                                                                        | Prevalence estimates or Mean/SD                                                                                                                                                                                                                                                                                                                                               | Main results                                                                                                   |
|---------------------------------------------------------------------------------|---------------------------------------------------------------------------------------------|----------------------------------------------------------------------------------------------------------------------------|----------------------------------------------------------------------------------------------------------------------------------------------------------------------------------------------------------------------------------------|-------------------------------------------------------------------------------------------------------------------------------------------------------------------------------------------------------------------------------------------------------------------------------------------------------------------------------------------------------------------------------|----------------------------------------------------------------------------------------------------------------|
| <b>Inpatient Samples</b>                                                        |                                                                                             |                                                                                                                            |                                                                                                                                                                                                                                        |                                                                                                                                                                                                                                                                                                                                                                               |                                                                                                                |
| Yates & Wallace, 1987 (USA) [38]c                                               | N = 50. Men and women with BPAD. Study <i>excluded</i> non-white patients                   | Expected rates derived from general population data for age- and gender-specific controls (NHANES II Survey data 1971-75). | Prevalence of hypertension – defined as: (1) Patient history or physician diagnosis of hypertension; (2) Use of antihypertensive medication; (3) mean BP > 160/95 mmHg<br><br>Also report mean systolic and diastolic BP (with 95% CI) | Obs = 14/50 (28%); Exp = 5.6 (11.2%)<br><i>Males</i> : Obs = 7/25 (28%); Exp = 3.0 (12%)<br><i>Females</i> : Obs = 7/25 (28%); Exp = 2.6 (10.4%)<br><br>Mean SBP = 128.7 (124.1-132.33)<br><i>Males</i> = 123.7 (117.3-130.00)<br><i>Females</i> = 133.8 (127.8-139.0)<br>Mean DBP = 81.0 (77.9-84.1)<br><i>Males</i> = 79.5 (75.4-83.6)<br><i>Females</i> = 82.5 (77.6-87.4) | None reported<br>*Calculated risk ratio = 2.5                                                                  |
| <b>Long Stay Samples</b>                                                        |                                                                                             |                                                                                                                            |                                                                                                                                                                                                                                        |                                                                                                                                                                                                                                                                                                                                                                               |                                                                                                                |
| Steinert et al, 1996 (Germany)[36]c                                             | N = 90. Men and women with SCZ or S-AFF. Age range 41-90 years                              | Data from German DHP Studie (1988) – Men and women, aged 40-70 years.                                                      | Mean systolic and diastolic blood pressure (with SD)                                                                                                                                                                                   | <i>SMI</i> : Male = 126.8 (11.3)/79.3 (7.1)<br>Female = 127.2 (15.4)/78.2 (5.9)<br><i>General population data</i> :<br>Male = 139.2 (19.5)/85.4 (11.9)<br>Female = 136.0 (15.8)/82.0 (11.2)                                                                                                                                                                                   | None reported                                                                                                  |
| <b>(C) STUDIES COMPARING PATIENTS WITH SMI TO PATIENTS WITH OTHER DIAGNOSES</b> |                                                                                             |                                                                                                                            |                                                                                                                                                                                                                                        |                                                                                                                                                                                                                                                                                                                                                                               |                                                                                                                |
| <b>Community Samples</b>                                                        |                                                                                             |                                                                                                                            |                                                                                                                                                                                                                                        |                                                                                                                                                                                                                                                                                                                                                                               |                                                                                                                |
| Chafetz et al, 2005 (USA) [33]                                                  | N = 271. Men and women with SCZ or S-AFF                                                    | N = 510. Men and women. Patients with other psychiatric diagnoses                                                          | Prevalence of hypertension (derived from nurse records)                                                                                                                                                                                | <i>SMI</i> : Obs = 39/271(14.4%)<br><i>Other diagnoses</i> : Obs = 56/510 (11.0%)                                                                                                                                                                                                                                                                                             | No OR reported<br>*Calculated risk ratio = 1.31 (0.90 to 1.92)                                                 |
| <b>Outpatient Samples</b>                                                       |                                                                                             |                                                                                                                            |                                                                                                                                                                                                                                        |                                                                                                                                                                                                                                                                                                                                                                               |                                                                                                                |
| Gierz & Jeste, 1993 (USA)[34]                                                   | N = 30. Elderly men and women with SCZ. From US Veterans clinic: mean age 67.6 yrs (SD 6.5) | N = 26. Elderly men and women with DEP from same clinic: mean age = 66.5 yrs (SD 4.5)                                      | Prevalence of hypertension (derived from chart/records review)                                                                                                                                                                         | <i>SMI</i> : Observed rate = 26.7%<br><i>DEP</i> : Observed rate = 46.2%<br><i>General population rate</i> : Over 65 years = 37.9%                                                                                                                                                                                                                                            | No OR reported<br>*Calculated risk ratio = 0.58 (vs Depression)<br>*Calculated risk ratio = 0.70 (vs gen popn) |
| <b>Long Stay Samples</b>                                                        |                                                                                             |                                                                                                                            |                                                                                                                                                                                                                                        |                                                                                                                                                                                                                                                                                                                                                                               |                                                                                                                |
| Steinert et al, 1996 (Germany) [36]c                                            | N = 90. Men and women with SCZ or S-AFF. Age range = 41-90 years                            | N = 90. Men and women with DEP. Age range 39-88 years                                                                      | Prevalence of hypertension – definition unclear. Also report mean systolic and diastolic blood pressure (with SD)                                                                                                                      | <i>SMI</i> : Males – Obs = 3/43 (7%)<br>Females – Obs = 5/47 (10.6%)<br><i>DEP</i> : Males – Obs = 2/43 (4.7%)<br>Females – Obs = 2/47 (4.3%)<br><br>Mean SBP/DBP<br><i>SMI</i> : Male = 126.8 (11.3)/79.3 (7.1)<br>Female = 127.2 (15.4)/78.2 (5.9)<br><i>DEP</i> : Male = 123.2 (15.3)/76.7 (8.5)<br>Female = 124.6 (15.9)/78.0 (9.3)                                       | None reported.<br>*Calculated risk ratio = 2.00 (0.62 to 6.41)                                                 |

Notes on Tables: <sup>a</sup> Adjusted for BMI; <sup>b</sup> Adjusted for smoking; <sup>c</sup> Study also reports mean systolic and diastolic BP values; <sup>d</sup> Adjusted for age and gender; <sup>e</sup> Adjusted for age, gender and unemployment; <sup>f</sup> Data presented as part of metabolic syndrome study. \* If odds ratios or risk ratios are not reported in papers, risk ratios have been calculated wherever possible.

Abbreviations: SCZ = Schizophrenia; S-AFF = Schizoaffective Disorder; BPAD = Bipolar Affective Disorder; N-ACP = Non-affective Chronic Psychotic Illness; SFD = Schizophreniform Disorder; DEP = Depression/Major Depressive Disorder. BP: Blood pressure

TABLE 3: DYSLIPIDEMIA PAPERS

| Source                                    | Patient sample description                      | Comparison group description                                                                     | Outcome measure                                                                                   | Prevalence estimates or Mean/SD                                                                                                             | Main results                                                                                                                     |
|-------------------------------------------|-------------------------------------------------|--------------------------------------------------------------------------------------------------|---------------------------------------------------------------------------------------------------|---------------------------------------------------------------------------------------------------------------------------------------------|----------------------------------------------------------------------------------------------------------------------------------|
| <b>(A) STUDIES WITH A CONTROL GROUP</b>   |                                                 |                                                                                                  |                                                                                                   |                                                                                                                                             |                                                                                                                                  |
| <i>Community Samples</i>                  |                                                 |                                                                                                  |                                                                                                   |                                                                                                                                             |                                                                                                                                  |
| Osborn et al, 2006<br>(UK: England) [13]c | N = 74. Men and women with SCZ, S-AFF or N-ACP  | N = 148. Men and women                                                                           | Prevalence of raised total cholesterol (> 5.1 mmol/L)                                             | <i>SMI</i> : Obs = 41/74 (56.2%)<br><i>Control</i> : Obs = 73/148 (49.3%)                                                                   | Unadjusted OR = 1.3 (0.7 to 2.5)<br>Adjusted OR = 1.4 (0.8 to 2.5) <sup>b</sup><br>Adjusted OR = 1.9 (0.9 to 3.9) <sup>c</sup>   |
|                                           |                                                 |                                                                                                  | Prevalence of low HDL cholesterol (< 1.0 mmol/L)                                                  | <i>SMI</i> : Obs = 12/74 (16.7%)<br><i>Control</i> : Obs = 7/148 (4.8%)                                                                     | Unadjusted OR = 4.0 (1.5 to 10.7)<br>Adjusted OR = 3.9 (1.4 to 10.8) <sup>b</sup><br>Adjusted OR = 2.2 (0.7 to 7.6) <sup>c</sup> |
|                                           |                                                 |                                                                                                  | Prevalence of high total/HDL cholesterol ratio                                                    | <i>SMI</i> : Obs = 43/74 (59.7%)<br><i>Control</i> : Obs = 66/148 (44.9%)                                                                   | Unadjusted OR = 1.8 (1.0 to 3.2).<br>Adjusted OR = 1.7 (0.9 to 3.0) <sup>b</sup><br>Adjusted OR = 1.3 (0.7 to 2.6) <sup>c</sup>  |
|                                           |                                                 |                                                                                                  | Mean total cholesterol (mmol/L)                                                                   | <i>SMI</i> : Mean = 5.41 (SD 1.3)<br><i>Control</i> : Mean = 5.3 (SD 1.3)                                                                   | *Standardised mean diff= 0.08 (-0.20 to 0.36)                                                                                    |
|                                           |                                                 |                                                                                                  | Mean HDL cholesterol (mmol/L)                                                                     | <i>SMI</i> : Mean = 1.4 (SD 0.45)<br><i>Control</i> : Mean = 1.6 (SD 0.48)                                                                  | *Standardised mean diff = -.42 (-0.71 to -0.14)                                                                                  |
|                                           |                                                 |                                                                                                  | Mean LDL cholesterol (mmol/L)                                                                     | <i>SMI</i> : Mean = 2.98 (SD 1.05)<br><i>Control</i> : Mean = 2.98 (1.12)                                                                   | *Standardised mean diff = 0(-0.30 to 0.30)                                                                                       |
|                                           |                                                 |                                                                                                  | Mean triglycerides (mmol/L)                                                                       | <i>SMI</i> : Mean = 2.5 (SD 1.7)<br><i>Control</i> : Mean = 1.8 (SD 1.5)                                                                    | *Standardised mean diff = 0.47(0.16 to 0.73)                                                                                     |
|                                           |                                                 |                                                                                                  | Mean total/HDL cholesterol ratio                                                                  | <i>SMI</i> : Mean = 4.3 (SD 1.5)<br><i>Control</i> : Mean = 3.7 (SD 1.3)                                                                    | *Standardised mean diff = 0.44 (0.15 to 0.72)                                                                                    |
| McEvoy et al, 2005<br>(USA) [47]          | N=687. Men and women with chronic SCZ           | Compared to population from NHANES III study matched for age/race/gender (n=687)                 | Met metabolic syndrome criteria for HDL cholesterol (mg/dl)                                       | <i>Males</i> : <i>SMI</i> 48.9%, <i>Control</i> 31.9%<br><i>Females</i> <i>SMI</i> 63.3% <i>Controls</i> 36.3%                              | <i>SMI</i> > <i>Controls</i> Chi Sq P=0.000<br><i>SMI</i> > <i>controls</i> Chi Sq P=0.001                                       |
|                                           |                                                 |                                                                                                  | Met metabolic syndrome triglyceride (mg/dl) criteria                                              | <i>Males</i> : <i>SMI</i> = 50.7% <i>Controls</i> =32.1%<br><i>Females</i> : <i>SMI</i> =42.3% <i>Controls</i> =19.6%                       | <i>SMI</i> > <i>controls</i> Chi Sq P=0.000<br><i>SMI</i> > <i>controls</i> Chi Sq P=0.000                                       |
|                                           |                                                 |                                                                                                  | Mean HDL cholesterol (mg/dl) [fasting]                                                            | <i>Males</i> : <i>SMI</i> = 42.3 mg/dl; <i>Controls</i> =47.2 (No SD)<br><i>Females</i> : <i>SMI</i> = 47.7; <i>Controls</i> : 55.2 (No SD) | <i>SMI</i> < <i>controls</i> T test P=0.000<br><i>SMI</i> < <i>controls</i> T test P=0.000                                       |
|                                           |                                                 |                                                                                                  | Mean triglycerides (mg/dl) [fasting]                                                              | <i>Males</i> : <i>SMI</i> =194.7 <i>Controls</i> =143.6 (No SD)<br><i>Females</i> : <i>SMI</i> =173.8, <i>Controls</i> =118.9 (No SD)       | <i>SMI</i> > <i>controls</i> T test P=0.000<br><i>SMI</i> > <i>controls</i> T test P=0.000                                       |
| <i>Outpatient and Inpatient Samples</i>   |                                                 |                                                                                                  |                                                                                                   |                                                                                                                                             |                                                                                                                                  |
| Curkendall et al, 2004<br>(USA)[14]       | N = 3022. Men and women with SCZ                | N = 12,088. Age and sex matched to patients (4:1 ratio). Randomly selected from health databases | Prevalence of disorders of lipid metabolism (ICD-9 Code 272) or claims for antilipemic medication | <i>SMI</i> : Rate = 5.4%<br><i>Control</i> : Rate = 6.3%                                                                                    | No OR reported<br>*calculated risk ratio 0.86 (0.73, 1.01)                                                                       |
| Kilbourne et al, 2004<br>(USA)[16]        | N = 4310. Men and women with BPAD. US Veterans. | N = 3408760. National Veterans cohort. Demographically similar to patient group.                 | Prevalence of hyperlipidemia (ICD-9, codes not specified)                                         | <i>SMI</i> : Obs = 973/4310(22.6%)<br><i>Control</i> : No lipid data presented                                                              | No OR reported                                                                                                                   |

TABLE 3: DYSLIPIDEMIA PAPERS (continued)

| <i>Inpatient Samples</i>                                        |                                                                                                                |                                                                                                                                   |                                                                            |                                                                                              |                                                                                                           |
|-----------------------------------------------------------------|----------------------------------------------------------------------------------------------------------------|-----------------------------------------------------------------------------------------------------------------------------------|----------------------------------------------------------------------------|----------------------------------------------------------------------------------------------|-----------------------------------------------------------------------------------------------------------|
| Source                                                          | Patient sample description                                                                                     | Comparison group description                                                                                                      | Outcome measure                                                            | Prevalence estimates or Mean/SD                                                              | Main results                                                                                              |
| Saari et al, 2005 (Finland) [20]d                               | N = 31. Men and women with SCZ. All in early 30's (1966 Birth Cohort followed up 1997/98)                      | N = 5455. Men and women from same birth cohort without history of psychiatric treatment                                           | Prevalence of low HDL cholesterol (< 40 mg/dL in men; < 50 mg/dl in women) | <i>SMI</i> : Obs = 5/31(16%)<br><i>Control</i> : Obs = 588/5455 (11%)                        | No OR reported<br>*calculated risk ratio 1.50 (0.66, 3.39)                                                |
| Saari et al, 2004 (Finland) [39]                                | N = 31. Men and women with SCZ. All age 31 (1966 birth cohort followed up in 1997).                            | N = 5498. Men and women from same birth cohort without history of psychiatric treatment                                           | Mean total cholesterol (mg/dL)                                             | <i>SMI</i> : Mean = 214.1 mg/dL (SD 33.6)<br><i>Control</i> : Mean = 196.4 mg/dL (SD 39.0)   | ANOVA <sup>e</sup> : SMI > Controls (p = .039)<br>*Standardised mean difference = 0.46 (0.10 to 0.81)     |
|                                                                 |                                                                                                                |                                                                                                                                   | Mean HDL cholesterol (mg/dL)                                               | <i>SMI</i> : Mean HDL = 55.9 mg/dL (no SD)<br><i>Control</i> : Mean HDL = 60.5 mg/dL (no SD) | ANOVA <sup>e</sup> : SMI = Controls (n/sig)                                                               |
|                                                                 |                                                                                                                |                                                                                                                                   | Mean LDL cholesterol (mg/dL)                                               | <i>SMI</i> : Mean = 131.5 mg/dL (SD 30.5)<br><i>Control</i> : Mean = 116.3 mg/dL (no SD)     | ANOVA <sup>e</sup> : SMI = Controls (n/sig)                                                               |
|                                                                 |                                                                                                                |                                                                                                                                   | Mean fasting triglycerides (mg/dL)                                         | <i>SMI</i> : Mean = 134.9 (no SD)<br><i>Control</i> : Mean = 104.3 (no SD)                   | ANOVA <sup>e</sup> : SMI > Controls (p = .028)                                                            |
| Ryan et al, 2003 (UK/Eire) [19]                                 | N = 26. Men and women with SCZ. All first-episode and drug-naïve. Mean age 33.6 years                          | N = 26. Men and women. Mean age 34.4 years. Matched for age, exercise, diet, smoking, alcohol intake and anthropometric measures. | Mean fasting total cholesterol (mmol/L)                                    | <i>SMI</i> : Mean = 4.02 mmol/L (SD 0.78)<br><i>Control</i> : Mean = 4.57 mmol/L (SD 0.81)   | T-test: SMI < Controls (p <.02)<br>*Standardised mean difference = -0.69 (-1.25 to -0.13)                 |
|                                                                 |                                                                                                                |                                                                                                                                   | Mean HDL cholesterol (mmol/L)                                              | <i>SMI</i> : Mean = 1.20 mmol/L (SD 0.44)<br><i>Control</i> : Mean = 1.25 mmol/L (SD 0.25)   | T-test: SMI = Controls (n/sig)<br>*Standardised mean difference = -0.14 (-0.68 to 0.40)                   |
|                                                                 |                                                                                                                |                                                                                                                                   | Mean fasting LDL cholesterol (mmol/L)                                      | <i>SMI</i> : Mean = 2.39 mmol/L (SD 0.84)<br><i>Control</i> : Mean = 2.91 mmol/L (SD 0.69)   | T-test: SMI < Controls (p <.02)<br>*Standardised mean difference = -0.68 (-1.24 to -0.12)                 |
|                                                                 |                                                                                                                |                                                                                                                                   | Mean fasting triglycerides (nmol/L)                                        | <i>SMI</i> : Mean = 0.99 mmol/L (SD 0.43)<br><i>Control</i> : Mean = 0.92 mmol/L (SD 0.30)   | T-test: SMI = Controls (n/sig)                                                                            |
| Scottish Schizophrenia Research Group, 2000 (UK: Scotland) [40] | N = 30. Men and women with SCZ or SFD. First episode, drug-naïve. Mean age 28 years (males)/33 years (females) | N = 30. Matched for gender and age, smoking and dietary status. Mean age 30 years                                                 | Mean serum cholesterol (mmol/L)                                            | <i>SMI</i> : Mean = 4.63 mmol/L (SD 0.80)<br><i>Control</i> : Mean = 4.98 mmol/L (SD 0.91)   | SMI = Controls (n/sig)<br>*Standardised mean difference = -0.41 (-0.92 to 0.10) – note: 73% sample smoked |
|                                                                 |                                                                                                                |                                                                                                                                   | Mean serum lipid peroxide levels (umol/L)                                  | <i>SMI</i> : Mean = 0.50 umol/L (SD 0.16)<br><i>Control</i> : Mean = 0.54 umol/L (SD 0.23)   | SMI = Controls (n/sig)<br>(Note: 73% sample smoked)                                                       |

TABLE 3: DYSLIPIDEMIA PAPERS (Continued)

| (B) STUDIES COMPARING PATIENTS WITH SMI TO NORMATIVE DATA                |                                                                            |                                                                                                  |                                                                              |                                                                                                                                                                                                                                  |                                                                     |
|--------------------------------------------------------------------------|----------------------------------------------------------------------------|--------------------------------------------------------------------------------------------------|------------------------------------------------------------------------------|----------------------------------------------------------------------------------------------------------------------------------------------------------------------------------------------------------------------------------|---------------------------------------------------------------------|
| <i>Outpatient and Inpatient Samples</i>                                  |                                                                            |                                                                                                  |                                                                              |                                                                                                                                                                                                                                  |                                                                     |
| Source                                                                   | Patient sample description                                                 | Comparison group description                                                                     | Outcome measure                                                              | Prevalence estimates or Mean/SD                                                                                                                                                                                                  | Main results                                                        |
| Cohn et al, 2004 (Canada) [37]d                                          | N = 240. Men and women with SCZ or S-AFF                                   | General population rates from anadian Heart Health Survey (1986-1990)                            | Mean total cholesterol (mmol/L)                                              | Means presented as graphs – exact values not given in table or text                                                                                                                                                              | T-tests: SMI = Controls (n/sig) for males and females               |
|                                                                          |                                                                            |                                                                                                  | Mean HDL cholesterol (mmol/L)                                                | Means presented as graphs – exact values not given in table or text                                                                                                                                                              | T-tests: SMI < Controls for males (p > .001) and females (p = .002) |
|                                                                          |                                                                            |                                                                                                  | Mean triglycerides (mmol/L)                                                  | Exact means/SDs not specified in text or a table. Means presented as graphs (with error bars)                                                                                                                                    | T-tests: SMI > Controls for males (p = .001) and females (p = .009) |
| <i>Long Stay Samples</i>                                                 |                                                                            |                                                                                                  |                                                                              |                                                                                                                                                                                                                                  |                                                                     |
| Steinert et al, 1996 (Germany)[36]                                       | N = 90. Men and women with SCZ or S-AFF. Age range = 41-90                 | General population survey data (DHP Study 1988)                                                  | Mean total cholesterol (mg/dL)                                               | SMI: Males: Mean = 205.1 mg/dL (SD 37.0)<br>Females: Mean = 201.7 mg/dL (SD 44.2)<br><i>General population:</i><br>Males: Mean = 242.9 mg/dL (SD 45.0)<br>Females: Mean = 250.7 mg/dL (SD 45.1)                                  | SMI < Controls for males and females (ps < .001)                    |
| (C) STUDIES COMPARING PATIENTS WITH SMI TO PATIENTS WITH OTHER DIAGNOSES |                                                                            |                                                                                                  |                                                                              |                                                                                                                                                                                                                                  |                                                                     |
| <i>Inpatient Samples</i>                                                 |                                                                            |                                                                                                  |                                                                              |                                                                                                                                                                                                                                  |                                                                     |
| Yates & Wallace, 1987 (USA) [21]                                         | N = 50. Men and women with BPAD. <i>Excluded non-white patients</i>        | N = 50. Men and women with DEP, matched for gender and age                                       | Mean fasting cholesterol (mg/dL). <i>Normal range cited as 130-315 mg/dL</i> | SMI: Mean = 184.5 mg/dL (CI: 173.0 to 196.0)<br>Males: Mean = 180.4 (CI 164.2 to 196.6)<br>Females: Mean = 189.0 (CI 171.6 to 206.4)<br>DEP: Mean = 204.3 mg/dL (No CI's reported)<br>Males: Mean = 198.2; Females: Mean = 210.4 | None reported                                                       |
| <i>Long Stay Samples</i>                                                 |                                                                            |                                                                                                  |                                                                              |                                                                                                                                                                                                                                  |                                                                     |
| Steinert et al, 1996 (Germany)[36]                                       | N = 90. Men and women with SCZ or S-AFF. Mean age 62.6 years (range 41-90) | N = 90. Men and women with DEP. Mean age 62.3 years (range 39-88).                               | Mean total cholesterol (mg/dL)                                               | SMI: Males: Mean = 205.1 mg/dL (SD 37.0)<br>Females: Mean = 201.7 mg/dL (SD 44.2)<br>DEP: Males: Mean = 219.7 mg/dL (SD 50.6)<br>Females: Mean = 223.5 mg/dL (SD 42.9)                                                           | None reported                                                       |
|                                                                          |                                                                            |                                                                                                  | Mean triglycerides (mg/dL)                                                   | SMI: Males: Mean = 128.9 mg/dL (SD 72.6)<br>Females: Mean = 137.2 mg/dL (SD 70.9)<br>DEP: Males: Mean = 158.0 mg/dL (SD 77.8)<br>Females: Mean = 136.8 mg/dL (SD 69.5)                                                           | None reported                                                       |
| <i>Source of sample unclear</i>                                          |                                                                            |                                                                                                  |                                                                              |                                                                                                                                                                                                                                  |                                                                     |
| Roccatagliata et al, 1980 (Italy)[41]                                    | N = 60. Men and women with SCZ.                                            | N = 60. Men and women with neurological or other psychiatric disorders. Matched for age and sex. | Mean total cholesterol (mg/dL)                                               | SMI: Mean = 188.2 mg/dL (SD 45.4)<br><i>Other diagnosis:</i> Mean = 219.0 mg/dL (SD 31.8)                                                                                                                                        | T-test: SCZ < Controls (p = .005)                                   |
|                                                                          |                                                                            |                                                                                                  | Mean total lipid (mg/dL)                                                     | SMI: Mean = 821.5 mg/dL (SD 539.9)<br><i>Other diagnosis:</i> Mean = 840.1 mg/dL (SD 157.7)                                                                                                                                      | T-test: SCZ = Controls (n/sig)                                      |
|                                                                          |                                                                            |                                                                                                  | Mean triglycerides (mg/dL)                                                   | SMI: Mean = 173.3 mg/dL (SD 306.7)<br><i>Other diagnosis:</i> Mean = 131.2 mg/dL (SD 45.4)                                                                                                                                       | T-test: SCZ = Controls (n/sig)                                      |

Notes on Table: <sup>a</sup> Osborn et al (2006) also report mean total/HDL cholesterol ratios and mean values (mmol/L) for total cholesterol, HDL cholesterol, LDL cholesterol and triglycerides. <sup>b</sup> Adjusted for age and gender. <sup>c</sup> Adjusted for age, gender and unemployment. <sup>d</sup> Data presented as part of metabolic syndrome study. <sup>e</sup> Adjusted for sex, BMI, smoking and alcohol consumption. \* If odds ratios or risk ratios are not reported in papers, risk ratios or standardised mean differences have been calculated wherever possible.

Abbreviations: SCZ = Schizophrenia; S-AFF = Schizoaffective Disorder; BPAD = Bipolar Affective Disorder; N-ACP = Non-affective Chronic Psychotic Illness; SFD = Schizophreniform Disorder; DEP = Unipolar Depression/Major Depressive Disorder



TABLE 4: METABOLIC SYNDROME PAPERS

| Source                                                           | Patient sample description                                                                                    | Comparison group description                                                                  | Outcome measures                                                                                                                                                                                   | Prevalence estimates                                                                                                                                     | Main results                                                                                      |
|------------------------------------------------------------------|---------------------------------------------------------------------------------------------------------------|-----------------------------------------------------------------------------------------------|----------------------------------------------------------------------------------------------------------------------------------------------------------------------------------------------------|----------------------------------------------------------------------------------------------------------------------------------------------------------|---------------------------------------------------------------------------------------------------|
| <b>(A) STUDIES WITH A CONTROL GROUP</b>                          |                                                                                                               |                                                                                               |                                                                                                                                                                                                    |                                                                                                                                                          |                                                                                                   |
| <i>Inpatient Samples</i>                                         |                                                                                                               |                                                                                               |                                                                                                                                                                                                    |                                                                                                                                                          |                                                                                                   |
| Saari et al, 2005 (Finland) [20]                                 | N = 31. Men and women with SCZ. All in early 30's (from North Finland 1966 Birth Cohort followed up 1997/98). | N = 5455. Men and women from same 1966 birth cohort with no history of psychiatric treatment. | Prevalence of metabolic syndrome – defined as the presence of 3 or more of 5 NCEP ATP III criteria <sup>a</sup>                                                                                    | <i>SMI</i> : Obs = 6/31 cases (19.4%)<br><i>Control</i> : Obs = 326/5455 cases (6%)                                                                      | Adjusted OR = 3.7 (CI: 1.5 to 9.0) <sup>b</sup><br>*Calculated risk ratio = 3.24 (1.57 to 6.69)   |
| McEvoy et al, 2005 (USA) [47]                                    | N=687. Men and women with chronic SCZ                                                                         | Compared to population from NHANES III study matched for age/race/gender (n=687)              | Prevalence of metabolic syndrome – defined as the presence of 3 or more of 5 NCEP ATP III criteria <sup>a</sup>                                                                                    | <i>Male SMI</i> : 183/508 (36.0%) <i>Controls</i> : 19.7%<br><i>Female SMI</i> : 92/178 (51.6%) <i>Controls</i> : 25.1%                                  | No OR reported.<br>*calculated risk ratios:<br>Male: 1.83 (1.42-2.36)<br>Female: 2.02 (1.40-2.96) |
| <b>(B) STUDIES COMPARING PATIENTS WITH SMI TO NORMATIVE DATA</b> |                                                                                                               |                                                                                               |                                                                                                                                                                                                    |                                                                                                                                                          |                                                                                                   |
| <i>Outpatient Samples</i>                                        |                                                                                                               |                                                                                               |                                                                                                                                                                                                    |                                                                                                                                                          |                                                                                                   |
| Heiskanen et al, 2003 (Finland) [42]                             | N = 35. Men and women with SCZ or S-AFF                                                                       | Finnish general population data from Vanhala et al (1997) and Laaksonen et al (2002) studies  | Prevalence of metabolic syndrome – defined as the presence of 3 or more of 5 NCEP ATP III criteria <sup>a</sup>                                                                                    | <i>SMI</i> : Obs = 13/35 cases (37%)<br>Males = 9/19 (47%); Females = 4/16 (25%)<br><i>General population rates</i> :<br>Males = 11-17%; Females = 6-20% | None reported<br>*Calculated risk ratio = 3.38 (males)<br>*Calculated risk ratio = 2.00 (females) |
| Basu et al, 2004 (USA) [43]                                      | N = 33. Men and women with S-AFF                                                                              | Data from US epidemiological study (N=8814) – Ford et al 2002                                 | Prevalence of metabolic syndrome – defined as the presence of 3 or more of 5 NCEP ATP III criteria <sup>a</sup>                                                                                    | <i>SMI</i> : Obs = 14/33 cases (42.4%)<br>Males = 7/14 (50.0%); Females = 7/19 (36.8%)<br><i>General population rate</i> = 23.7%                         | None reported<br>*Calculated risk ratio = 1.79                                                    |
| <i>Outpatient and Inpatient Samples</i>                          |                                                                                                               |                                                                                               |                                                                                                                                                                                                    |                                                                                                                                                          |                                                                                                   |
| Cohn et al, 2004 (Canada) [37]                                   | N = 240. Men and women with SCZ or S-AFF                                                                      | Data from US epidemiological study (N=8814) – Ford et al 2002                                 | Prevalence of metabolic syndrome – defined as the presence of 3 or more of 5 NCEP ATP III criteria <sup>a</sup> <u>and/or</u> current treatment with anti-hypertensive or anti-diabetic medication | <i>SMI rates</i> :<br>Males = 42.6%; Females = 48.5%<br><i>General population rates</i> :<br>Males = 24%; Females = 23%                                  | None reported<br>*Calculated risk ratio = 1.77 (males)<br>*Calculated risk ratio = 2.11 (females) |

Note: <sup>a</sup> The National Cholesterol Education Program (NCEP) ATP III criteria for Metabolic Syndrome are: (1) Abdominal obesity – waist circumference > 102 cm (40 inc) in men; > 88 cm (35 inc) in women; (2) Fasting hypertriglyceridemia -  $\geq 1.69$  mmol/L or 150 mg/dL; (3) Low fasting HDL - < 1.04 mmol/L or 40 mg/dL in men; < 1.29 mmol/L or 50 mg/dL in women; (4) Hypertension -  $\geq 130/85$  mmHg; (5) Fasting Hyperglycaemia -  $\geq 6.1$  mmol/L or 110 mg/dL. <sup>b</sup> Odds ratio adjusted for gender. \* If odds ratios or risk ratios are not reported in papers, risk ratios have been calculated wherever possible.

Abbreviations: SCZ = Schizophrenia; S-AFF = Schizoaffective Disorder; BPAD = Bipolar Affective Disorder.

TABLE 5: FRAMINGHAM RISK SCORE PAPERS

| Source                                                           | Patient sample description                                                                            | Comparison group description                                                                                                               | Outcome measure                                                                                                                                                                                                                               | Prevalence estimates or Mean/SD or Median/IQR                                                                                                                                                                                                             | Main results                                                                                                                                                                                                                                                                     |
|------------------------------------------------------------------|-------------------------------------------------------------------------------------------------------|--------------------------------------------------------------------------------------------------------------------------------------------|-----------------------------------------------------------------------------------------------------------------------------------------------------------------------------------------------------------------------------------------------|-----------------------------------------------------------------------------------------------------------------------------------------------------------------------------------------------------------------------------------------------------------|----------------------------------------------------------------------------------------------------------------------------------------------------------------------------------------------------------------------------------------------------------------------------------|
| <b>(A) STUDIES WITH A CONTROL GROUP</b>                          |                                                                                                       |                                                                                                                                            |                                                                                                                                                                                                                                               |                                                                                                                                                                                                                                                           |                                                                                                                                                                                                                                                                                  |
| <i>Community Samples</i>                                         |                                                                                                       |                                                                                                                                            |                                                                                                                                                                                                                                               |                                                                                                                                                                                                                                                           |                                                                                                                                                                                                                                                                                  |
| Osborn et al, 2006 (UK: England)[13]                             | N = 74. Men and women with SCZ, S-AFF or N-ACP                                                        | N = 148. Men and women.                                                                                                                    | Prevalence of raised Framingham Risk Score for CHD (higher than expected for individual's age and gender)<br>Median absolute 10-year Framingham Risk Score (%) for CHD, with interquartile range<br>Mean Framingham Risk Score excess for CHD | <i>SMI</i> : Obs = 37 cases (51.4%)<br><i>Control</i> : Obs = 55 cases (37.4%)<br><br><i>SMI</i> : Median = 5%; IQR = 2-12%<br><i>Control</i> : Median = 4%; IQR = 2-9%<br><br><i>SMI</i> : Mean = 1.99 (SD 7.0)<br><i>Control</i> : Mean = 0.69 (SD 4.6) | Unadjusted OR = 1.7 (1.0 to 3.1)<br>Adjusted OR = 1.7 (0.9 to 3.0) <sup>a</sup><br>Adjusted OR = 1.3 (0.7 to 2.7) <sup>b</sup><br>Mann-Whitney test: SMI > Controls (p = .049)<br><br>T-test: SMI = Controls (n/sig)<br>*Standardised mean difference = 0.219 (-0.0441 to 0.516) |
| <i>Inpatient Samples</i>                                         |                                                                                                       |                                                                                                                                            |                                                                                                                                                                                                                                               |                                                                                                                                                                                                                                                           |                                                                                                                                                                                                                                                                                  |
| Luty et al, 2002 (UK: Scotland) [44]                             | N = 21. Men and women with SCZ or SFD. Mean age 31 years. First episode of illness; neuroleptic naive | N = 25. Men and women. Mean age 30 years. Matched for gender, age, smoking and dietary status                                              | Mean (10-year) Framingham Risk Score (%) for Heart Disease <sup>c</sup>                                                                                                                                                                       | <i>SMI (9 matched pairs)</i> : Mean score = 6% (SD 5)<br><i>Control (9 matched pairs)</i> : Mean score = 4% (SD 5)<br><i>General population data</i> : Mean score = 2% (SD 3).                                                                            | T-tests: SMI=Controls (n/sig); SMI>gen popn (p=.008); Controls>gen popn (p = .02)<br>*Standardised mean differences: SMI vs matched controls = 0.4 (-0.186 to 0.986)<br>SMI vs general population = 0.97                                                                         |
| <b>(B) STUDIES COMPARING PATIENTS WITH SMI TO NORMATIVE DATA</b> |                                                                                                       |                                                                                                                                            |                                                                                                                                                                                                                                               |                                                                                                                                                                                                                                                           |                                                                                                                                                                                                                                                                                  |
| <i>Community Samples</i>                                         |                                                                                                       |                                                                                                                                            |                                                                                                                                                                                                                                               |                                                                                                                                                                                                                                                           |                                                                                                                                                                                                                                                                                  |
| McCreadie, 2003 (UK: Scotland) [45]                              | N = 102. Men and women with SCZ                                                                       | Compared with general population norms (Scottish Health Survey, 1998)                                                                      | Mean (10-year) Framingham Risk Score (%) for CHD <sup>c</sup>                                                                                                                                                                                 | <i>SMI</i> : Males: Mean score = 10.5% (SD 8)<br>Females: Mean score = 7% (SD 6)<br><i>General population norms</i><br>Males: Mean score = 6.4% (SD 6)<br>Females: Mean score = 4.1% (SD 4)                                                               | T-tests: Males: SMI>gen popn (p = .001);<br>Females: SMI=gen popn (p = .06)<br>*Standardised mean differences: = 0.58 (males); = 0.568 (females)                                                                                                                                 |
| <i>Outpatient and Inpatient Samples</i>                          |                                                                                                       |                                                                                                                                            |                                                                                                                                                                                                                                               |                                                                                                                                                                                                                                                           |                                                                                                                                                                                                                                                                                  |
| Cohn et al, 2004 (Canada) [37]                                   | N = 240. Men and women with SCZ or S-AFF                                                              | N = 7020. Men and women, randomly selected from Canadian Heart Health Survey dataset (1986-1990). Matched for age and gender distribution. | Mean (10-year) Framingham Risk Score (%) for myocardial infarction                                                                                                                                                                            | <i>SMI</i> : Males: Mean score = 8.9% (no SD)<br>Females: Mean score = 2.6% (no SD)<br><i>General population</i> :<br>Males: Mean score = 6.3% (no SD)<br>Females: Mean score = 2.0% (no SD)                                                              | T-tests: Males: SMI > General population (p <.001); Females: SMI = Controls (n/sig)                                                                                                                                                                                              |

Notes: <sup>a</sup> Adjusted for age and gender. <sup>b</sup> Adjusted for age, gender and unemployment. <sup>c</sup> Also report Framingham Risk Score for Stroke. \* Standardised mean differences have been calculated where possible.

Abbreviations: SCZ = Schizophrenia; S-AFF = Schizoaffective Disorder; N-ACP = Non-Affective Chronic Psychotic Illness; SFD = Schizophreniform Disorder
